# Supplementary material for: Investigation of the reliability of nano-nickel/niobium oxide-based multilayer thin films deposited on polymer substrates for flexible electronic applications
Source: Royal Society of Chemistry journal article supplement (doi:10.1039/d3ma00147d), 2023-01-01
Supplement: d3ma00147d1.pdf [file d3ma00147d1.pdf]

# Investigation of the Reliability of Nano- Crystalline Ni/Nb based Multilayer Thin Films Deposited on Polymer Substrates for Flexible Electronic Applications

Rahul Sahay<sup>1,7\*</sup>, Yen-Cheng Tu<sup>2</sup>, Izzat Aziz<sup>3</sup>, Arief S. Budiman<sup>1,4,5,6\*</sup>, Cher Ming Tan<sup>2</sup>, Pooi

See Lee<sup>3</sup>, Olivier Thomas<sup>7</sup> and Nagarajan Raghavan<sup>8\*</sup>

## SUPPLEMENTARY MATERIALS

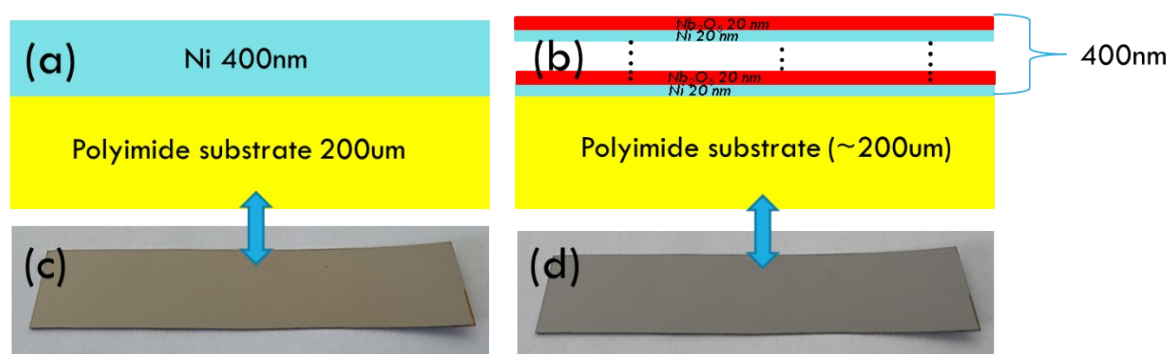

Figure. S1. The structure of the samples (a) Nickel/PI and (b) Nickel-Niobium oxide/PI (Ni-Nb<sub>2</sub>O<sub>5</sub>-PI), where 20 alternate layers (thickness = 20 nm) of Ni and Niobium oxide (Nb<sub>2</sub>O<sub>5</sub>) were deposited on PI.

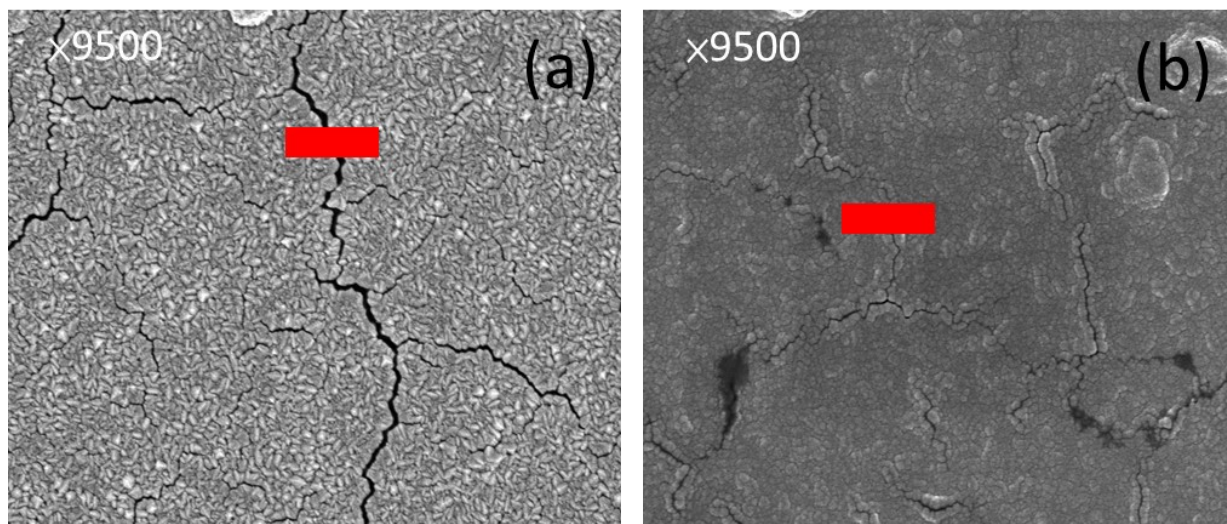

Figure S2. Location of the surface crack on the sample used for the fabrication of lamella through focused-ion beam (FIB). FIB lamella was cut perpendicular to surface cracks for (a) Ni-PI and (b) Ni-Nb<sub>2</sub>O<sub>5</sub>-PI. The images showing the cross-sectional TEM profiles of each of these samples can be found in Figures 4 to 6 of the main manuscript.

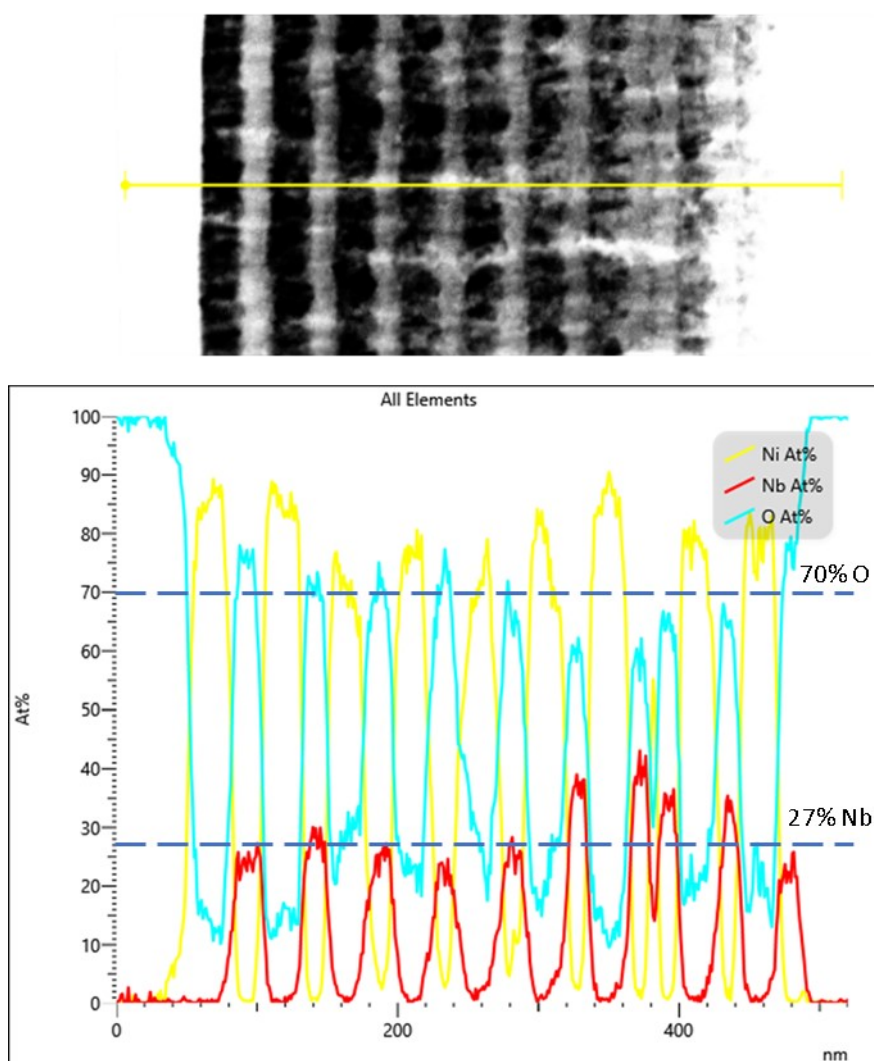

Figure S3. EDX along the cross-section of the Ni-Nb<sub>2</sub>O<sub>5</sub>-PI shows the presence of oxygen (O), nickel (Ni) as well as niobium (Nb) in the nanolayers. The presence of Ni is confirmed by the yellow line (at% ranging from ~77% to ~92%). The space between the alternate yellow line roughly depicts the thickness of Ni nanolayers. The green (at% ranging from ~62% to ~78%) and red (at% ranging from ~36% to ~44%) line represent O and Nb, respectively, which depict the presence of Nb<sub>2</sub>O<sub>5</sub> based on at% calculations, discussed in detail in the main text.

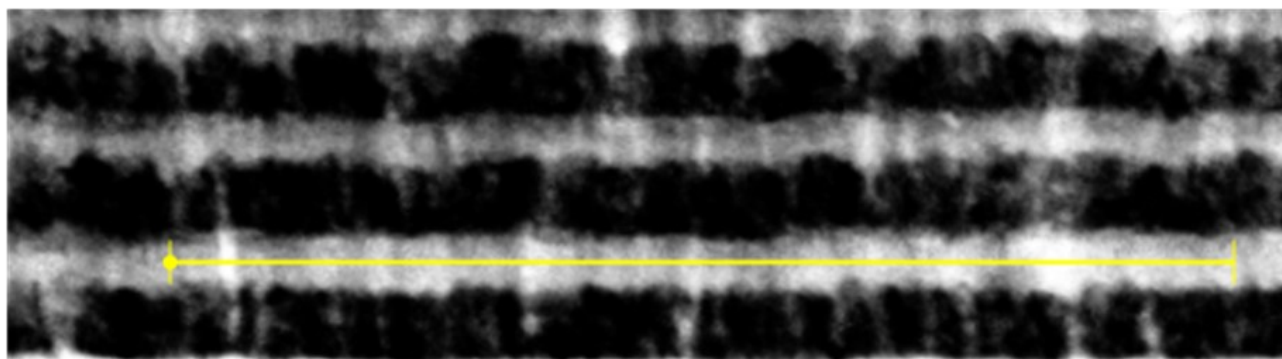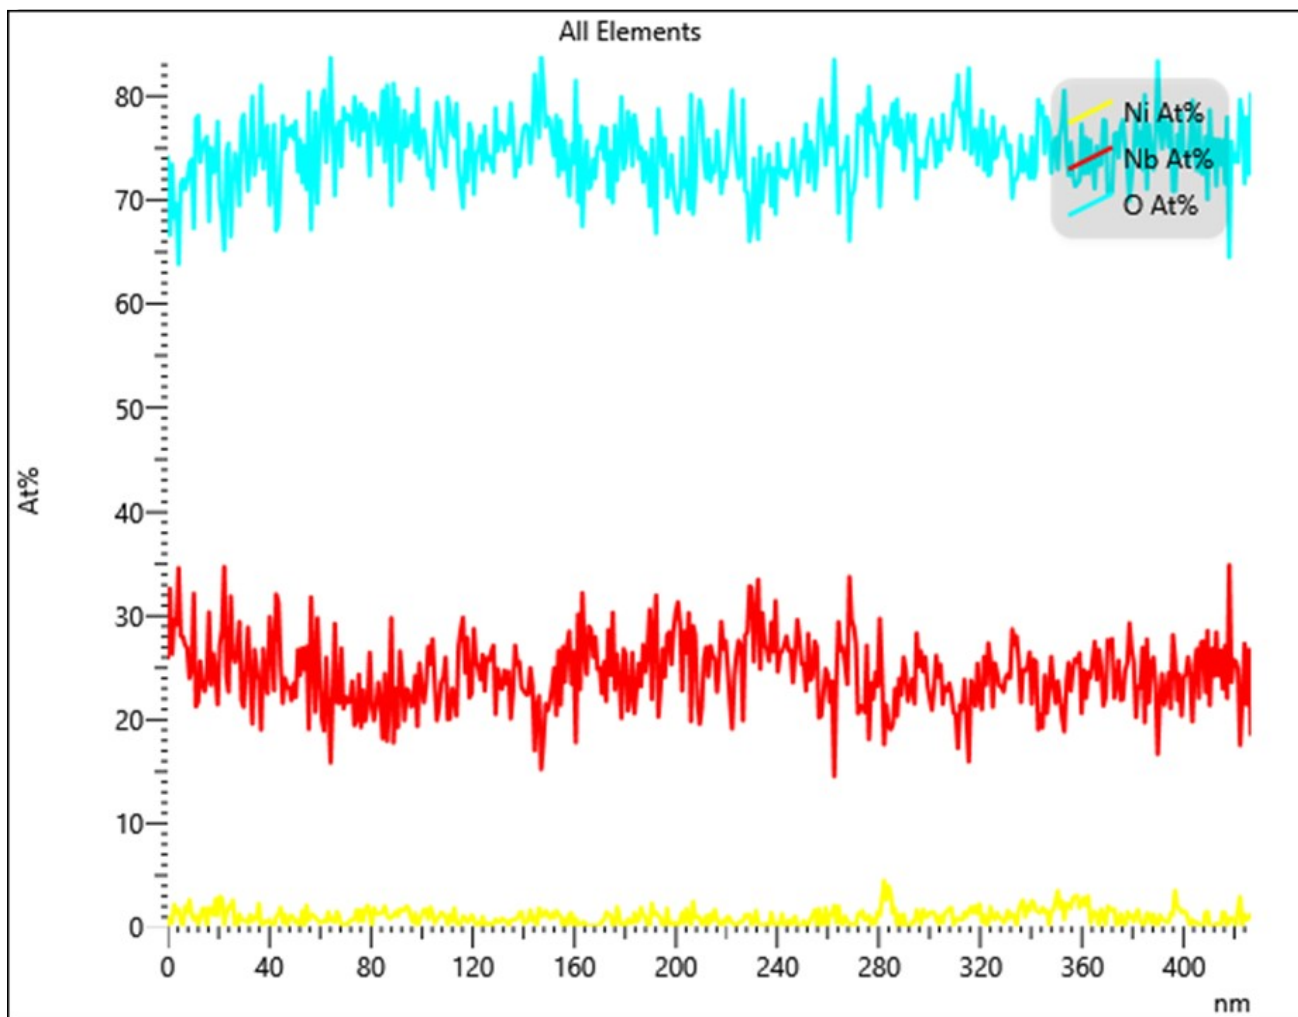

Figure S4. EDX line scan along the amorphous layer of the Ni-Nb<sub>2</sub>O<sub>5</sub>-PI shows the presence of oxygen (O) as well as niobium (Nb) in the amorphous layer depicting the formation of niobium oxide (Nb<sub>2</sub>O<sub>5</sub>).

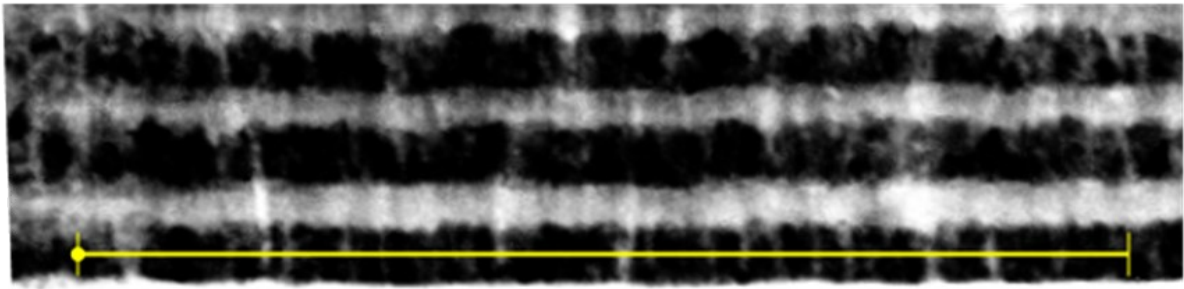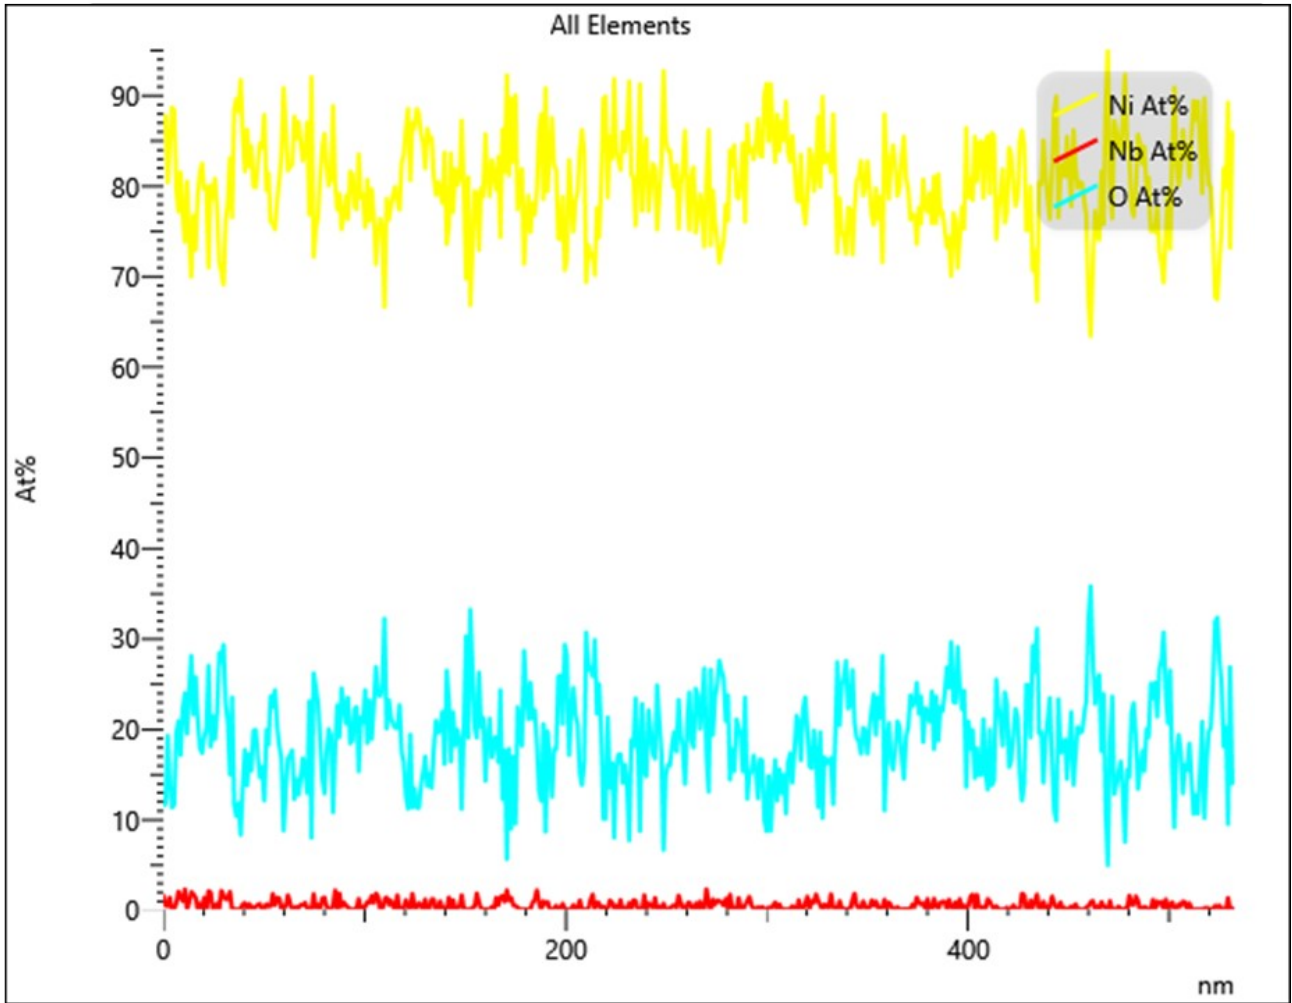

Figure S5. EDX line scan along the crystalline layer of the Ni-PI sample shows the presence of mainly Ni and a negligible proportion of Nb and O.

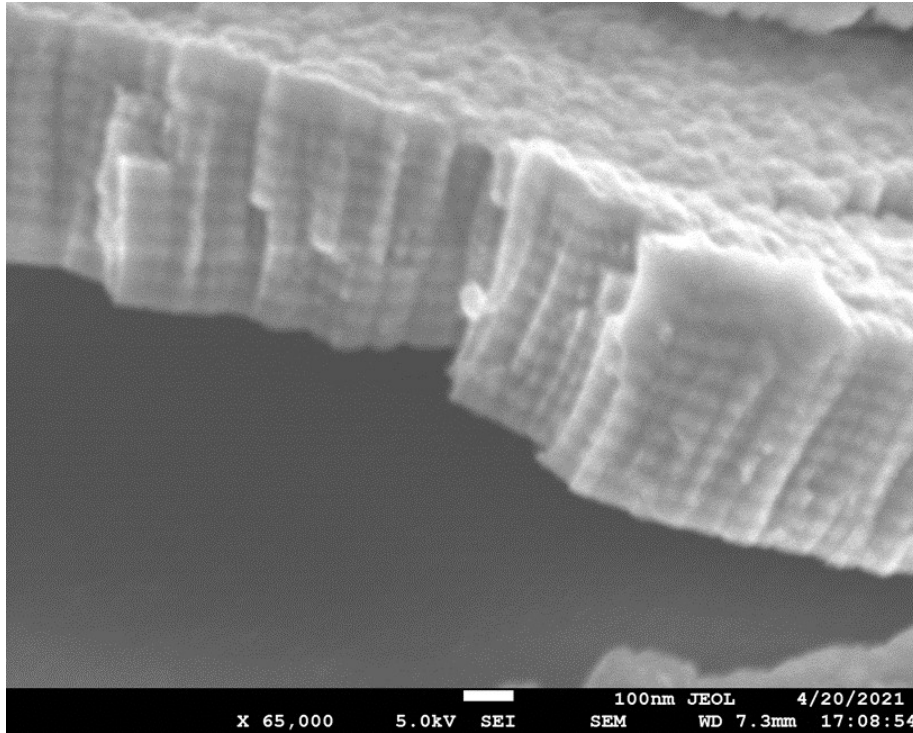

Figure S6. SEM image of Ni-Nb<sub>2</sub>O<sub>5</sub>-PI sample showing its columnar cross-section obtained after rate-dependent bending failure/fracture test.

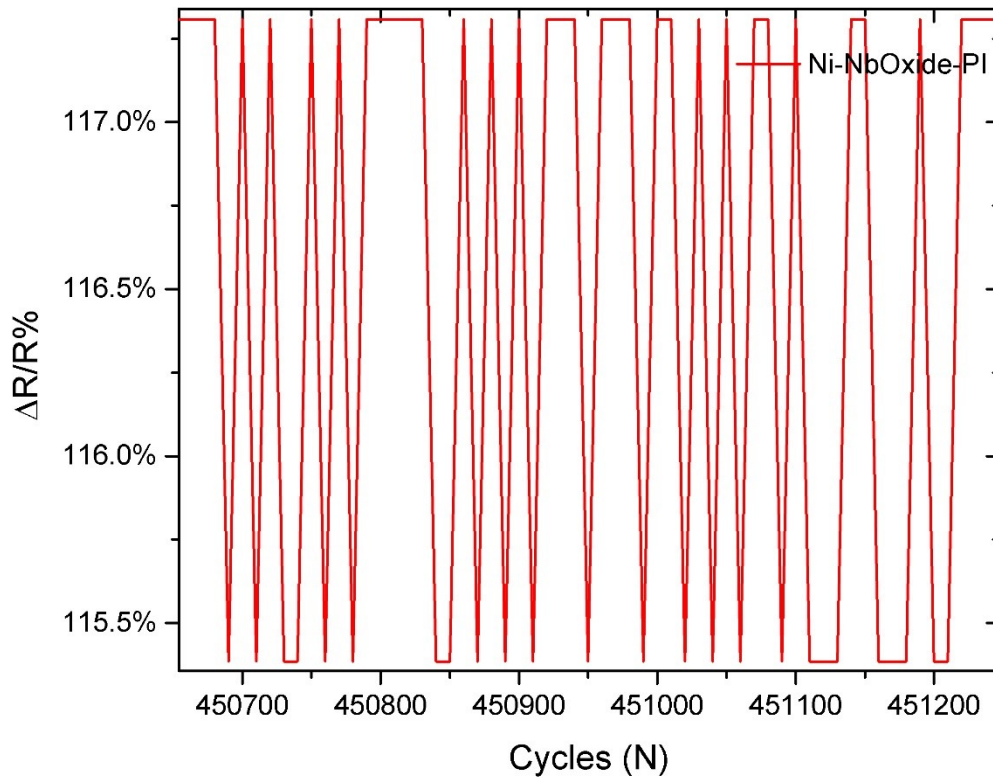

Figure S7. The  $\Delta R/R\%$  of Ni-Nb<sub>2</sub>O<sub>5</sub>-PI as a function of loading cycles depicting the variation of initial resistance oscillation peaks (shown by a dotted box in Figure 2(a)).

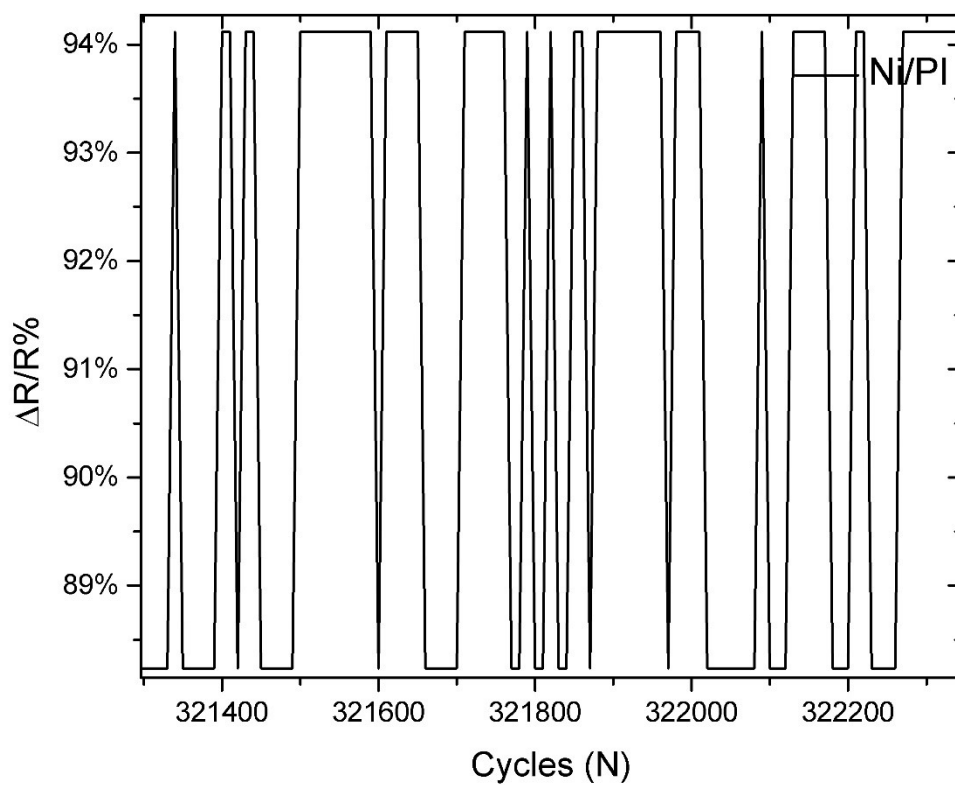

Figure S8. The  $\Delta R/R\%$  of Ni-PI as a function of loading cycles depicting the variation of initial resistance oscillation peaks (shown by a dotted box in Figure 2(a)).

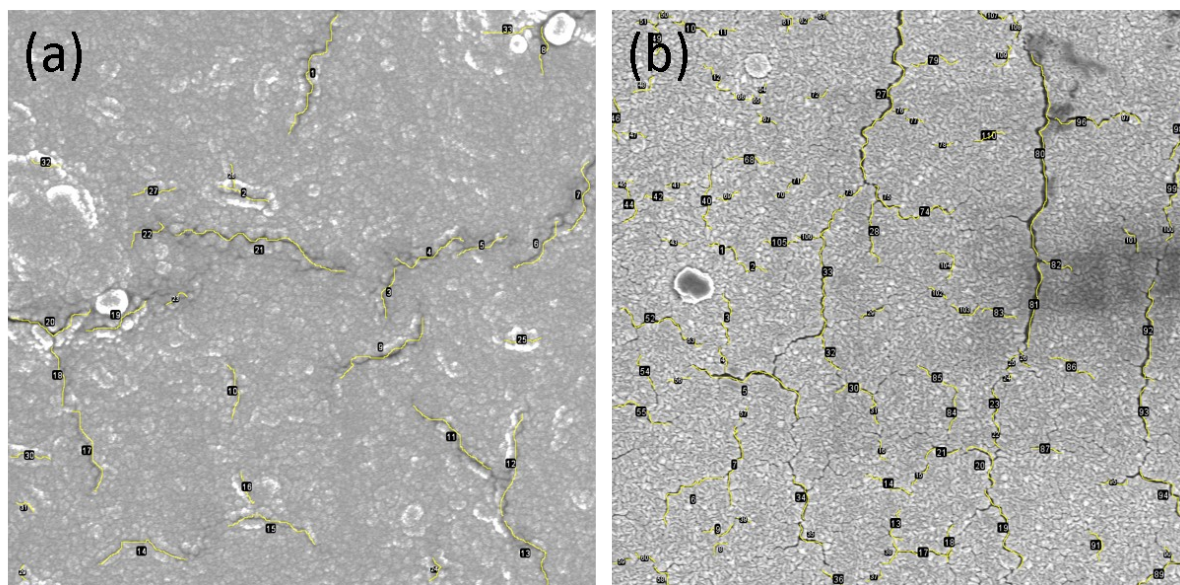

Figure S9. Representative image showing crack density and crack dimensions of the (a) Ni-Nb<sub>2</sub>O<sub>5</sub>-PI sample and (b) Ni-PI sample measured with *ImageJ* image processing software.
